# Supplementary material for: Introducing the novel concept of cumulative concentration roses for studying the transport of ultrafine particles from an airport to adjacent residential areas
Source: Copernicus journal article supplement (doi:10.5194/acp-24-137-2024), 2024-01-05
Supplement: Supplementary file 1 [file acp-24-137-2024-supplement.pdf]

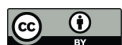

*Supplement of*

## **Introducing the novel concept of cumulative concentration roses for studying the transport of ultrafine particles from an airport to adjacent residential areas**

**Julius Seidler et al.**

*Correspondence to:* Julius Seidler ([julius.seidler@uni-bayreuth.de](mailto:julius.seidler@uni-bayreuth.de))

The copyright of individual parts of the supplement might differ from the article licence.

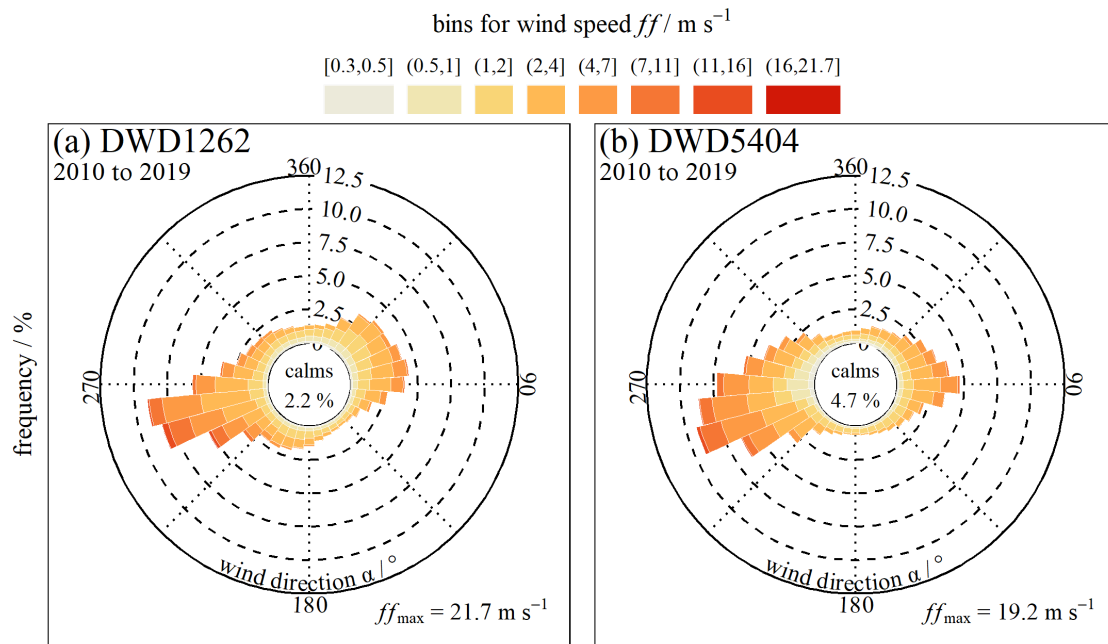

Figure S11: Wind roses based on wind data from DWD1262 at Munich Airport (a) and DWD5404 at Weihenstephan-Dürnast. Time period covered are full years from 2010 to 2019. Bottom right corner gives the maximum wind speed  $ff_{\max}$  observed for each data set.

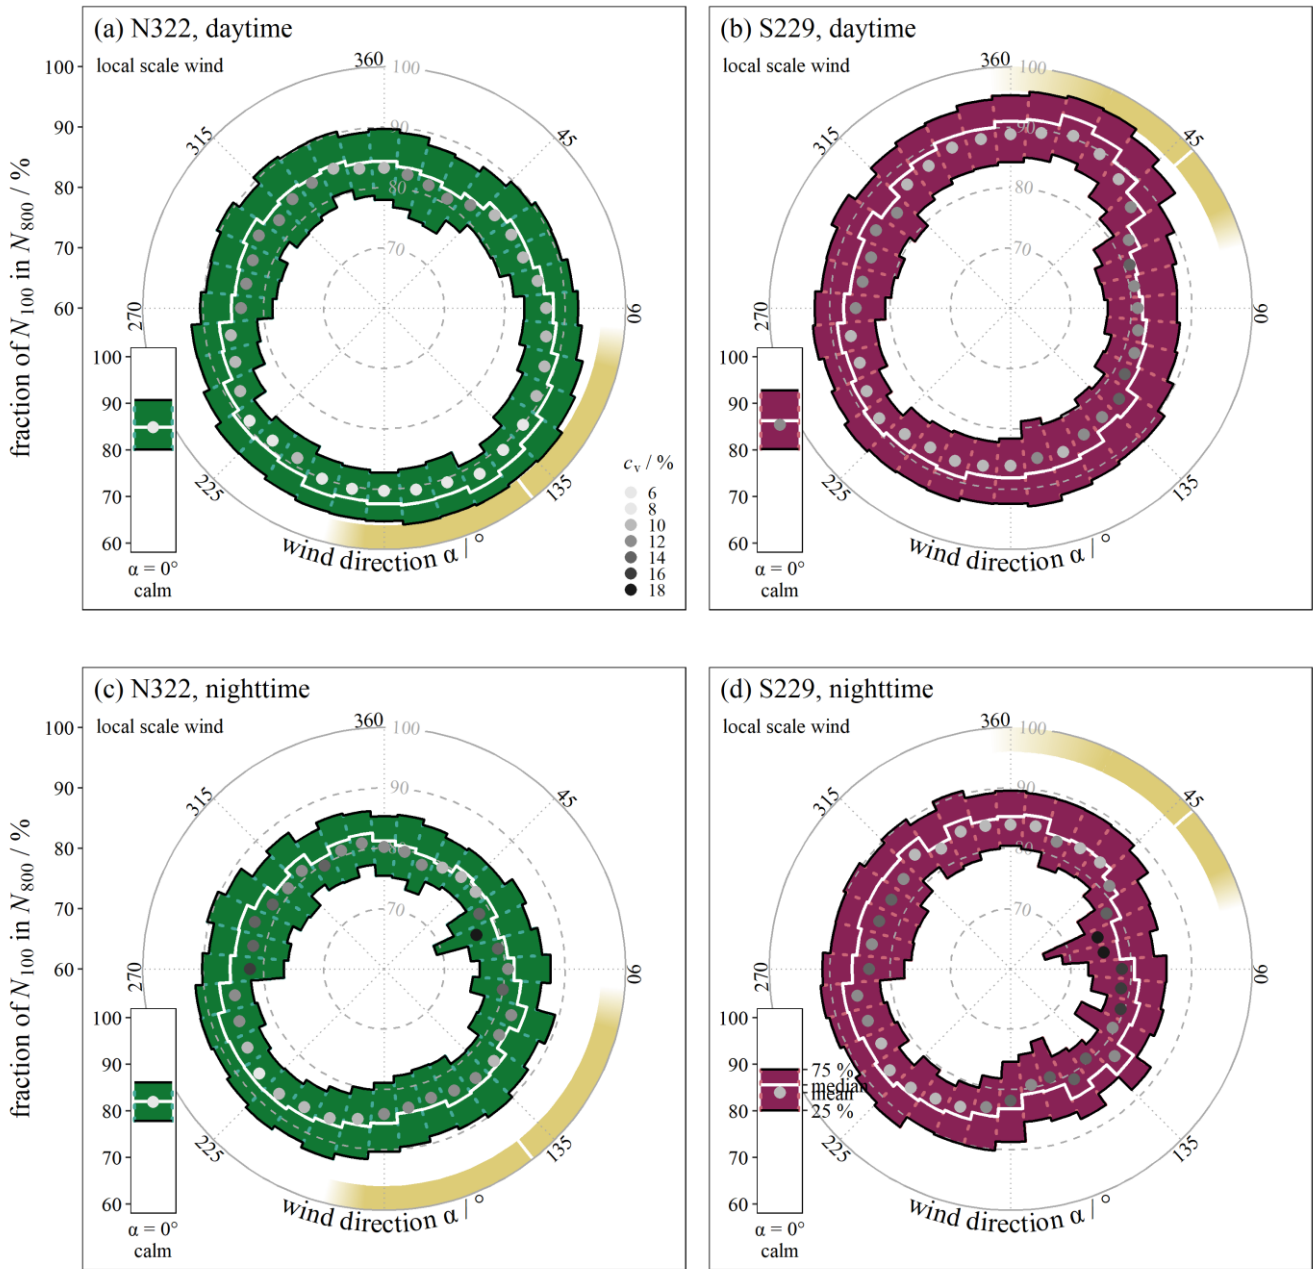

Figure S12: Representation of the fraction of particle number concentrations  $N_{100}$  in  $N_{800}$  as squeeze box plots for sites N322 (a and c) and S229 (b and d) for the time period covered in this study. Other than in Fig. 6–9 no 0% percentile is shown. Top and bottom panel distinguish between daytime and nighttime as defined in Sect. 2.1. The yellowish arc is the airport sector indicator, see Fig. 1.

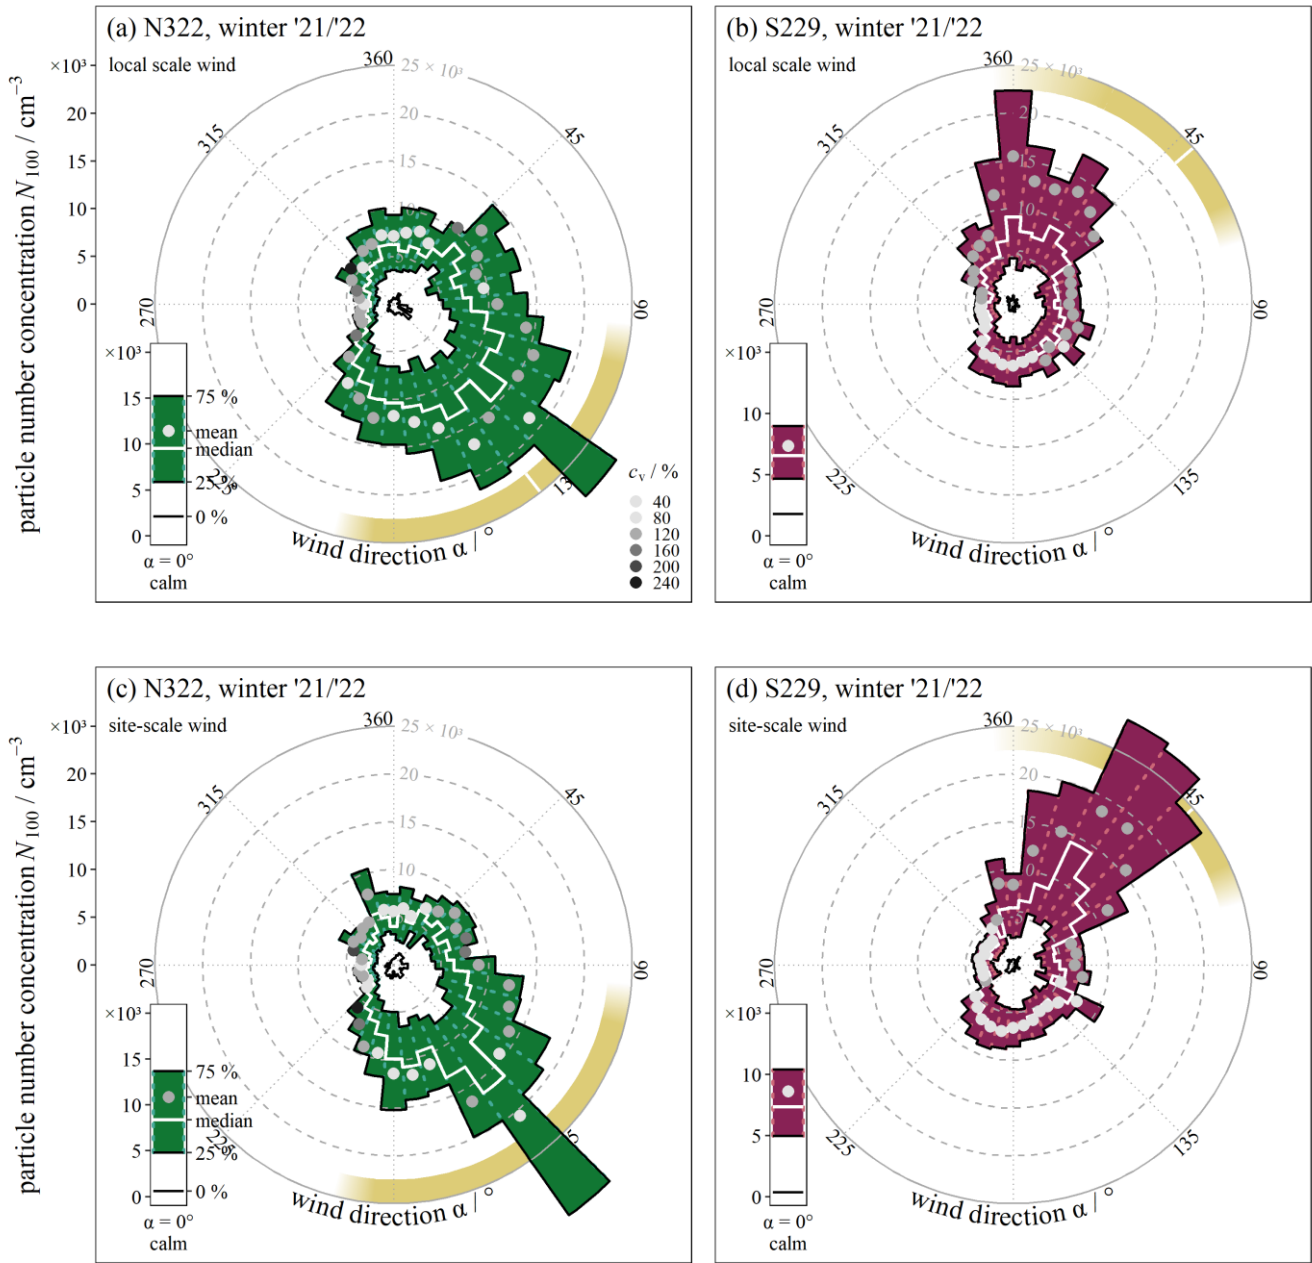

Figure S13: Concentration roses as squeeze box plots for particle number concentrations  $N_{100}$  for sites N322 (a and c) and S229 (b and d) for the time period of winter 2021/2022. Top and bottom panel distinguish between local scale and site-scale wind. The yellowish arc is the airport sector indicator, see Fig. 1.

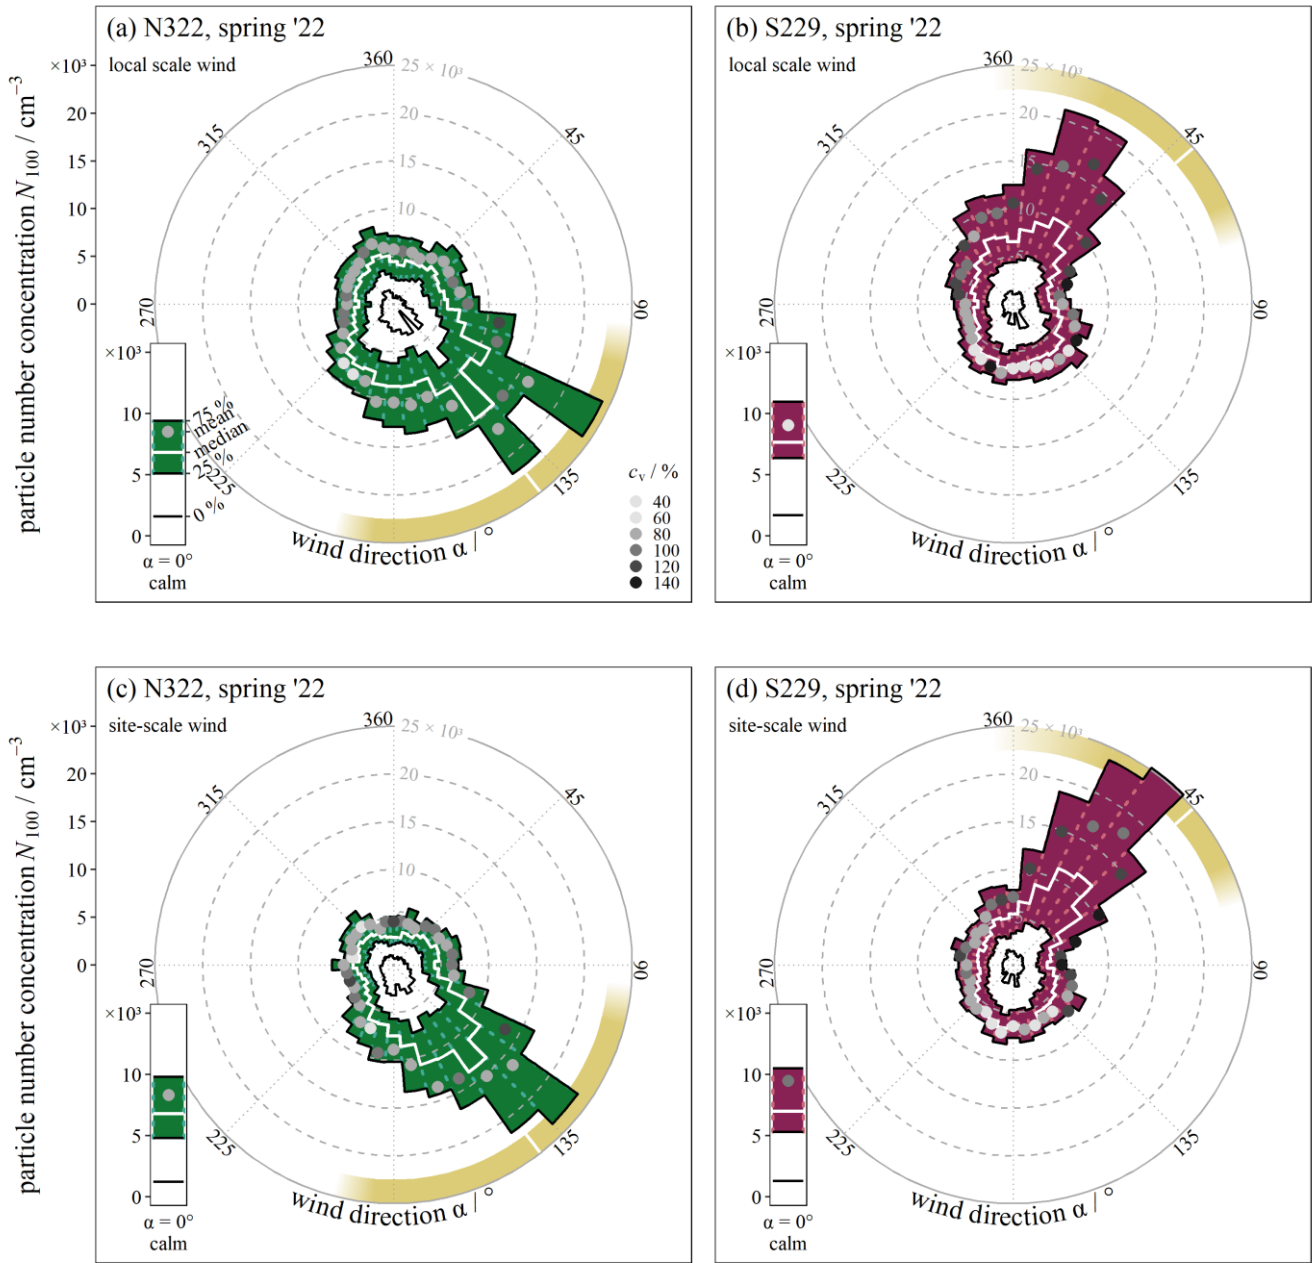

Figure SI4: Concentration roses as squeeze box plots for particle number concentrations  $N_{100}$  for sites N322 (a and c) and S229 (b and d) for the time period of spring 2022. Top and bottom panel distinguish between local scale and site-scale wind. The yellowish arc is the airport sector indicator, see Fig. 1.

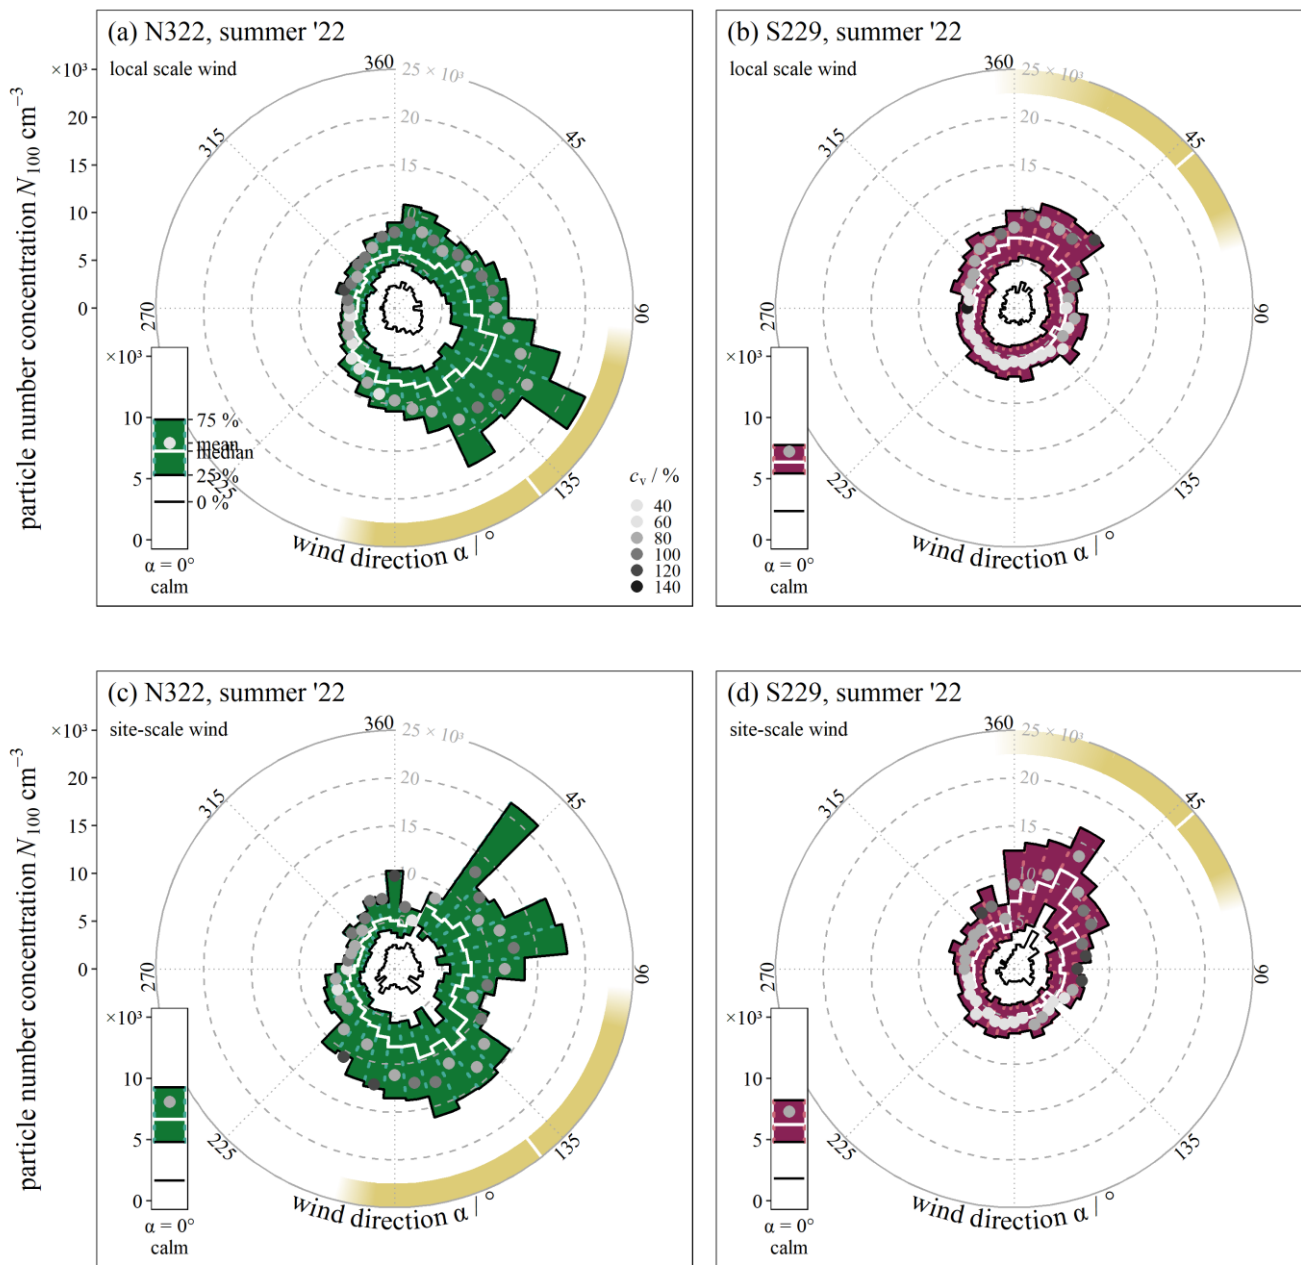

Figure S15: Concentration roses as squeeze box plots for particle number concentrations  $N_{100}$  for sites N322 (a and c) and S229 (b and d) for the time period of summer 2022. Top and bottom panel distinguish between local scale and site-scale wind. The yellowish arc is the airport sector indicator, see Fig. 1.



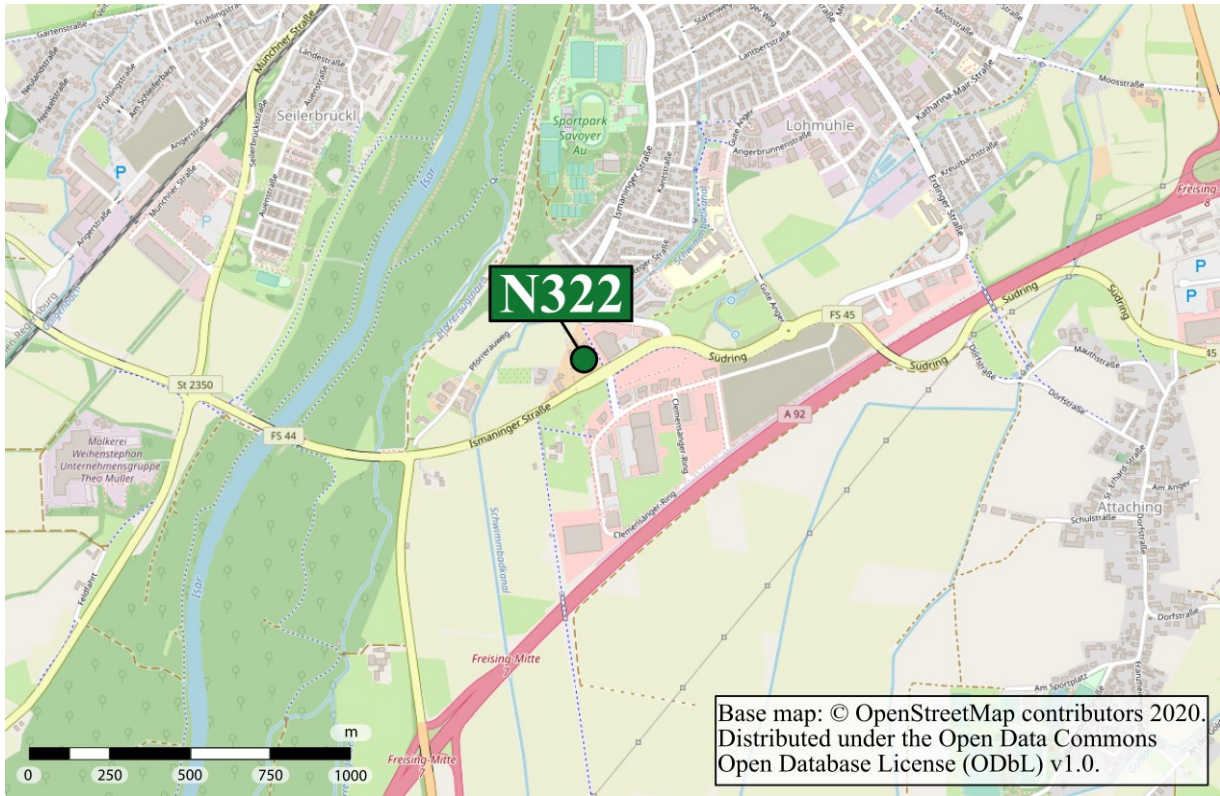

Fig. S16a: Map section of the immediate surroundings of site N322. Intended to be used together with the information given in Sect 2.2.

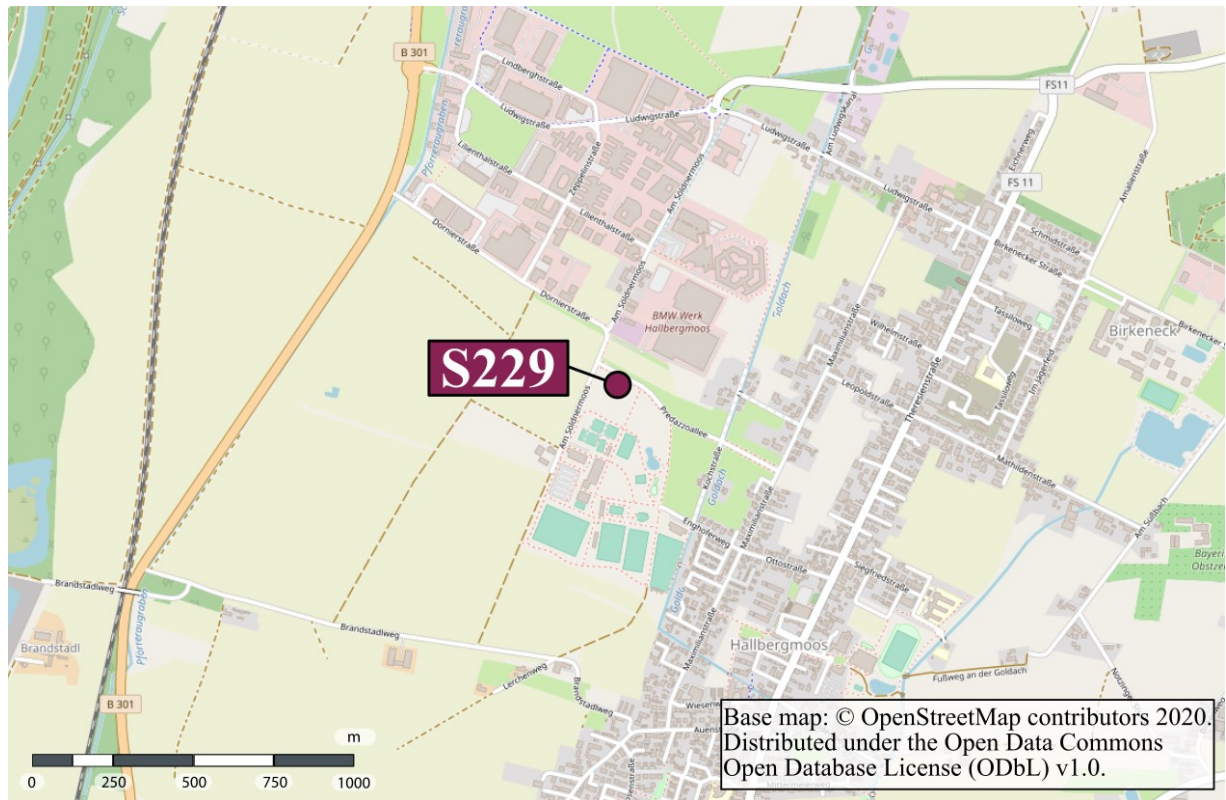

Fig. SI6b: Map section of the immediate surroundings of site S229. Intended to be used together with the information given in Sect 2.2.



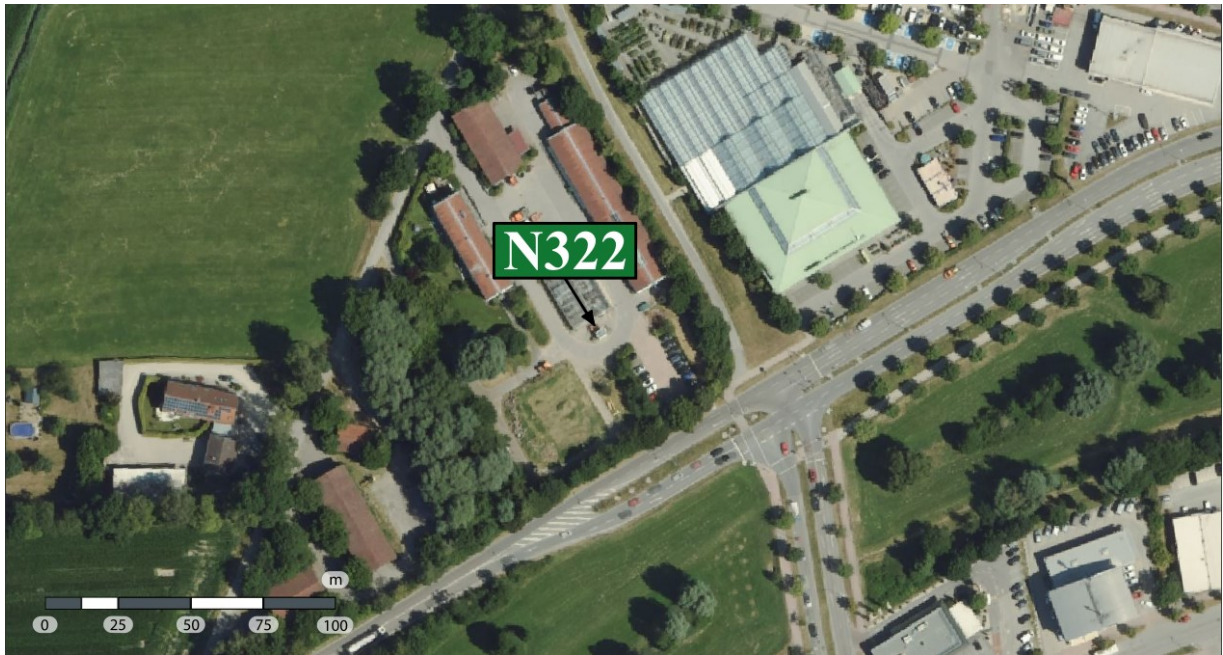

Fig. SI6c: Digital ortophotograph (DOP) of the immediate surroundings of site N322. DOP with 0.4 m resolution. Intended to be used together with the information given in Sect 2.2. CC BY 4.0, Bayerische Vermessungsverwaltung – [www.geodaten.bayern.de](http://www.geodaten.bayern.de). Labels and scale added by the authors.

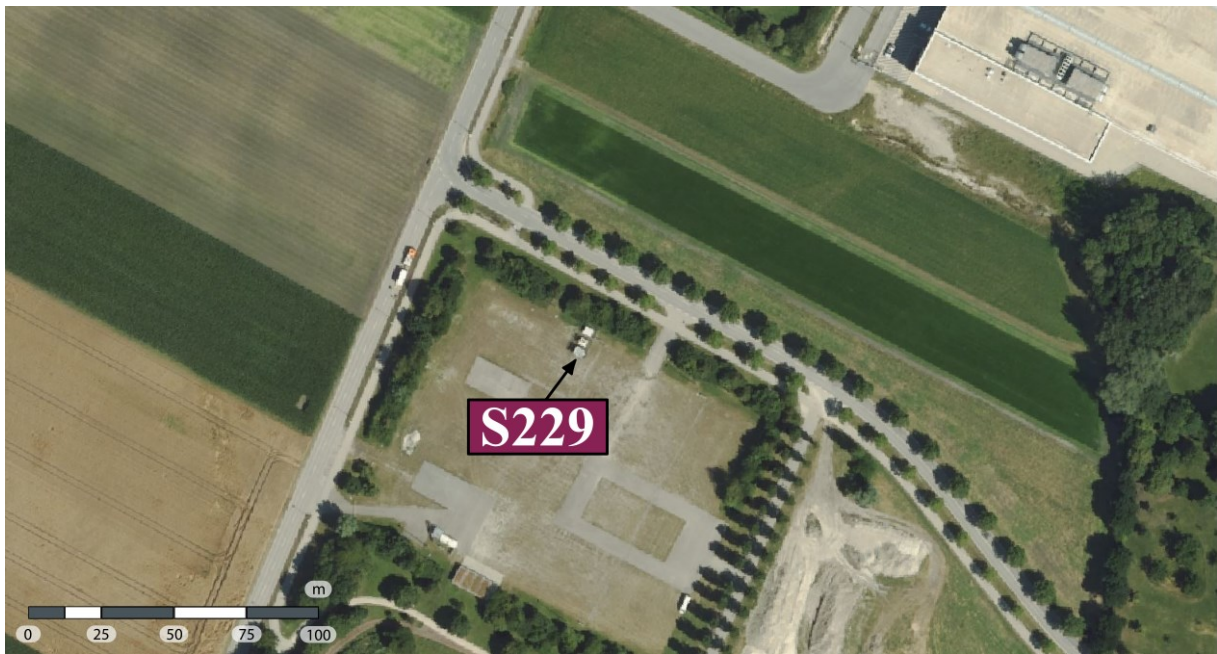

Fig. SI6d: Digital orthophotograph (DOP) of the immediate surroundings of site S229. DOP with 0.4 m resolution. Intended to be used together with the information given in Sect 2.2. CC BY 4.0, Bayerische Vermessungsverwaltung – [www.geodaten.bayern.de](http://www.geodaten.bayern.de). Labels and scale added by the authors.

Table S11: Factor of increase in median particle number concentrations for size fractions  $N_{100}$  and  $N_{800}$  between the sector *excluding* and the sector *including* Munich Airport. Calms are not included. See Fig. 1 for the sector definitions for each site. The table distinguishes the factors between two type of wind sources (local scale and site-scale wind, see Fig. 2 and Sect. 2.4), and the time of day (see Table 1 and Sect. 2.1). The time period covered is the whole observation period of this study.

| <i>size<br/>fraction</i> | <i>site</i> | <i>time of day</i> | <i>factor of increase</i> |                        |
|--------------------------|-------------|--------------------|---------------------------|------------------------|
|                          |             |                    | <i>local wind</i>         | <i>site-scale wind</i> |
| $N_{100}$                | N322        | daytime            | 2.2                       | 2.0                    |
|                          |             | nighttime          | 1.4                       | 1.5                    |
|                          |             | whole day          | 1.8                       | 2.0                    |
|                          | S229        | daytime            | 1.6                       | 1.8                    |
|                          |             | nighttime          | 1.2                       | 1.3                    |
|                          |             | whole day          | 1.5                       | 1.7                    |
| $N_{800}$                | N322        | daytime            | 2.0                       | 1.9                    |
|                          |             | nighttime          | 1.3                       | 1.4                    |
|                          |             | whole day          | 1.7                       | 1.8                    |
|                          | S229        | daytime            | 1.6                       | 1.8                    |
|                          |             | nighttime          | 1.3                       | 1.4                    |
|                          |             | whole day          | 1.5                       | 1.7                    |
